# Supplementary material for: Decreased TOB1 expression and increased phosphorylation of nuclear TOB1 promotes gastric cancer
Source: PubMed Central journal article supplement (PMC5650416; doi:10.18632/oncotarget.20749), 2017-09-08
Supplement: oncotarget-08-75243-s001.pdf [file oncotarget-08-75243-s001.pdf]

## **Decreased TOB1 expression and increased phosphorylation of nuclear TOB1 promotes gastric cancer**

### **SUPPLEMENTARY MATERIALS**

**Supplementary Table 1: The detailed information of tissue specimens from 341 gastric cancer patients**

See Supplementary File 1
